# Supplementary material for: Targeting SOS1 overcomes imatinib resistance with BCR-ABL independence through uptake transporter SLC22A4 in CML
Source: PubMed Central journal article supplement (PMC8654699; doi:10.1016/j.omto.2021.11.010), 2021-11-20
Supplement: mmc1.pdf [file mmc1.pdf]

**OMTO, Volume 23**

**Supplemental information**

**Targeting SOS1 overcomes imatinib resistance  
with BCR-ABL independence through  
uptake transporter SLC22A4 in CML**

**Yanjun Liu, Chuting Li, Rui Su, Zhao Yin, Guiping Huang, Juhua Yang, Zhendong Li, Keda Zhang, and Jia Fei**

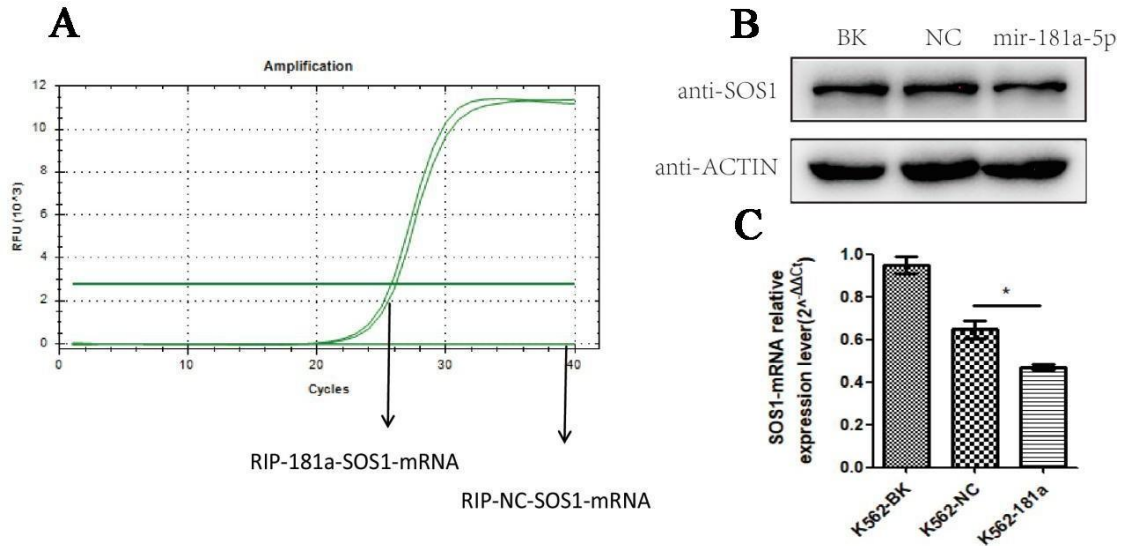

**Supplement Figure 1. Confirming SOS1 was one target of miR-181a-5p.** RIP conduct was tested the content of SOS1-mRNA through qPCR and the result show that SOS1-mRNA was test in K562-miR-181a-5p not in K562-NC (A). western blot (B) and qPCR (C) checked the relatively expression of SOS1 in K562 cell after transfected with miR-181a-5p mimic or NC, the result indicated that miR-181a-5p repressed the expression of SOS1. (The data were presented as the mean  $\pm$  SD obtained from at least three independent experiments. Significance was determined by one-way ANOVA, \*P<0.05, K562-miR-181-5p VS K562-NC.)

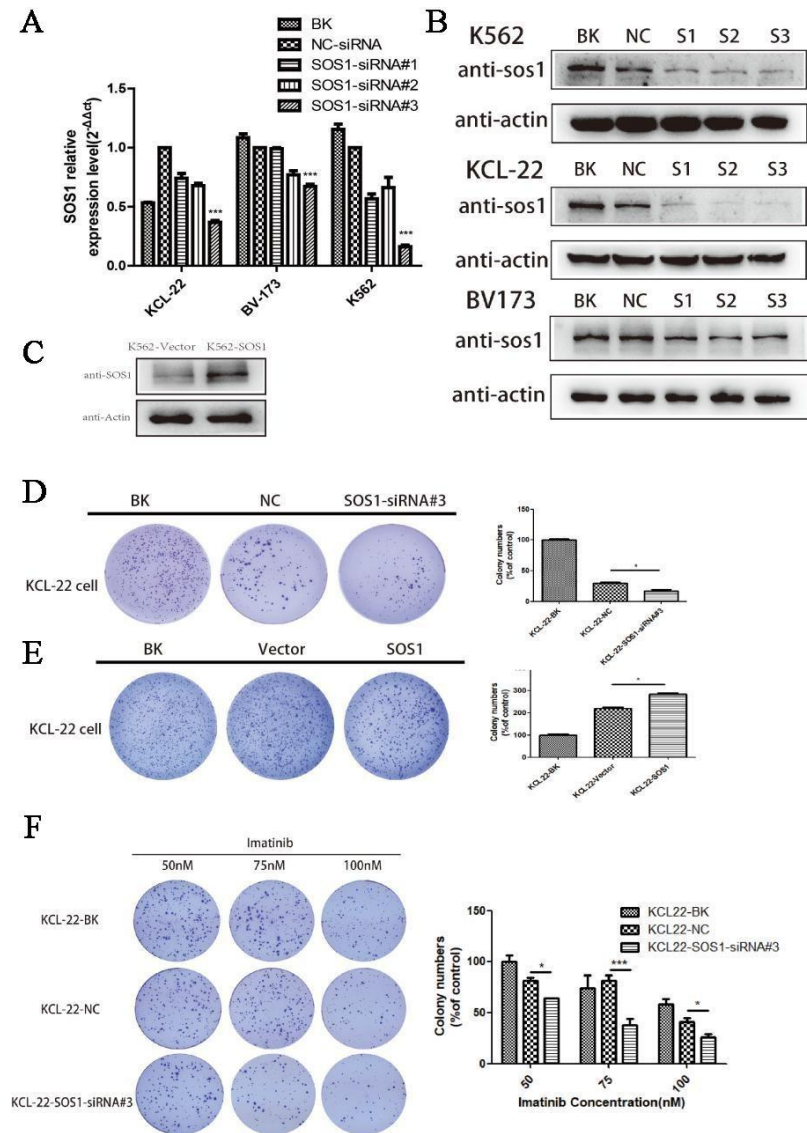

**Supplement Figure 2. SOS1 siRNA valid sequence and its function.** Screening of valid sequences of SOS1 siRNA from three siRNA which was synthesized randomly was analyzed by qPCR assays (A) and western blotting assays (B) in K562, KCL-22 and BV173 cells. Soft agar assay shown that SOS1-siRNA#3 restrained the colony-formation ability of KCL22 cell (D), and the overexpression of SOS1 in KCL22 cell, confirmed by western blot assay (C), enhanced this ability (E). Moreover, SOS1-siRNA#3 increased the drug sensitivity of KCL-22 cells to imatinib (F). (The data were presented as the mean  $\pm$  SD obtained from at least three independent experiments. Significance was determined by one/two-way ANOVA,  $^{*}/^{**}P<0.05$ ,  $^{***}P<0.01$  SOS1-siRNA#3 VS NC control, SOS1 overexpression VS empty-Vector control.)

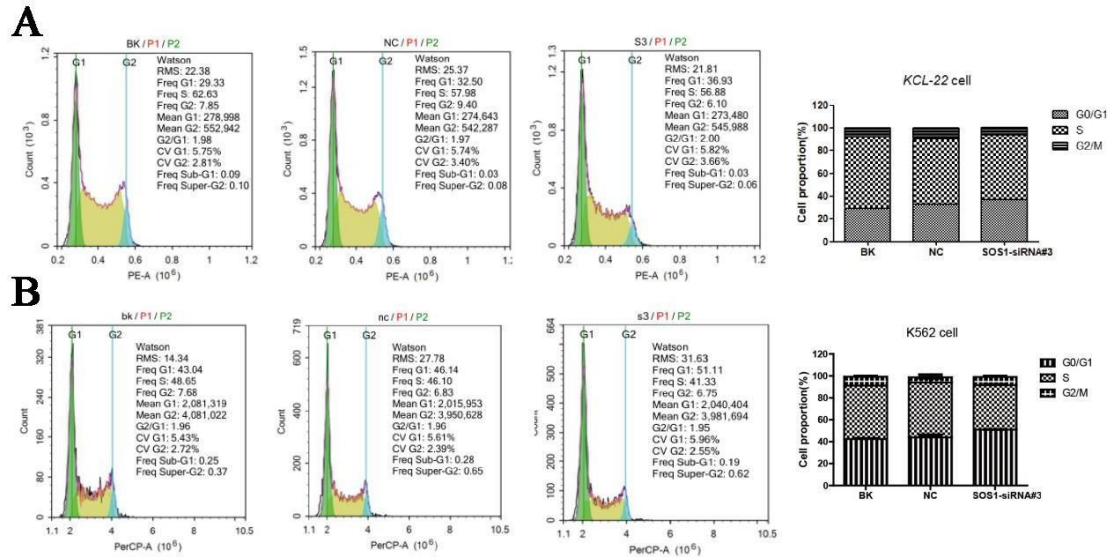

**Supplement Figure 3. Knockdown SOS1 arrested cell cycle.** (A and B) Equal amounts of KCL-22/K562 cells ( $3 \times 10^5$  cells/well) were transfected with SOS1-siRNA#3 or NC-siRNA (150 nM). Cells were harvested after 72h and washed with PBS for three times. Add 70% cold ethanol to the cells in 4°C overnight in order to fix cells. Finally, cells were centrifuged at 500g for 10 min, and cells were collected for cell cycle analysis. Add 500  $\mu$  L propidium iodide /RNaseA (Cell Cycle Detection Kit, keygentec) staining solution prepared in advance, avoiding light at room temperature for 30-60min. The cells were analysed by BD Accuri C6 flow cytometer. As is shown in the picture above, the cell cycle of the cells which transfected with SOS1-siRNA#3 arrested at G0/G1 phase.

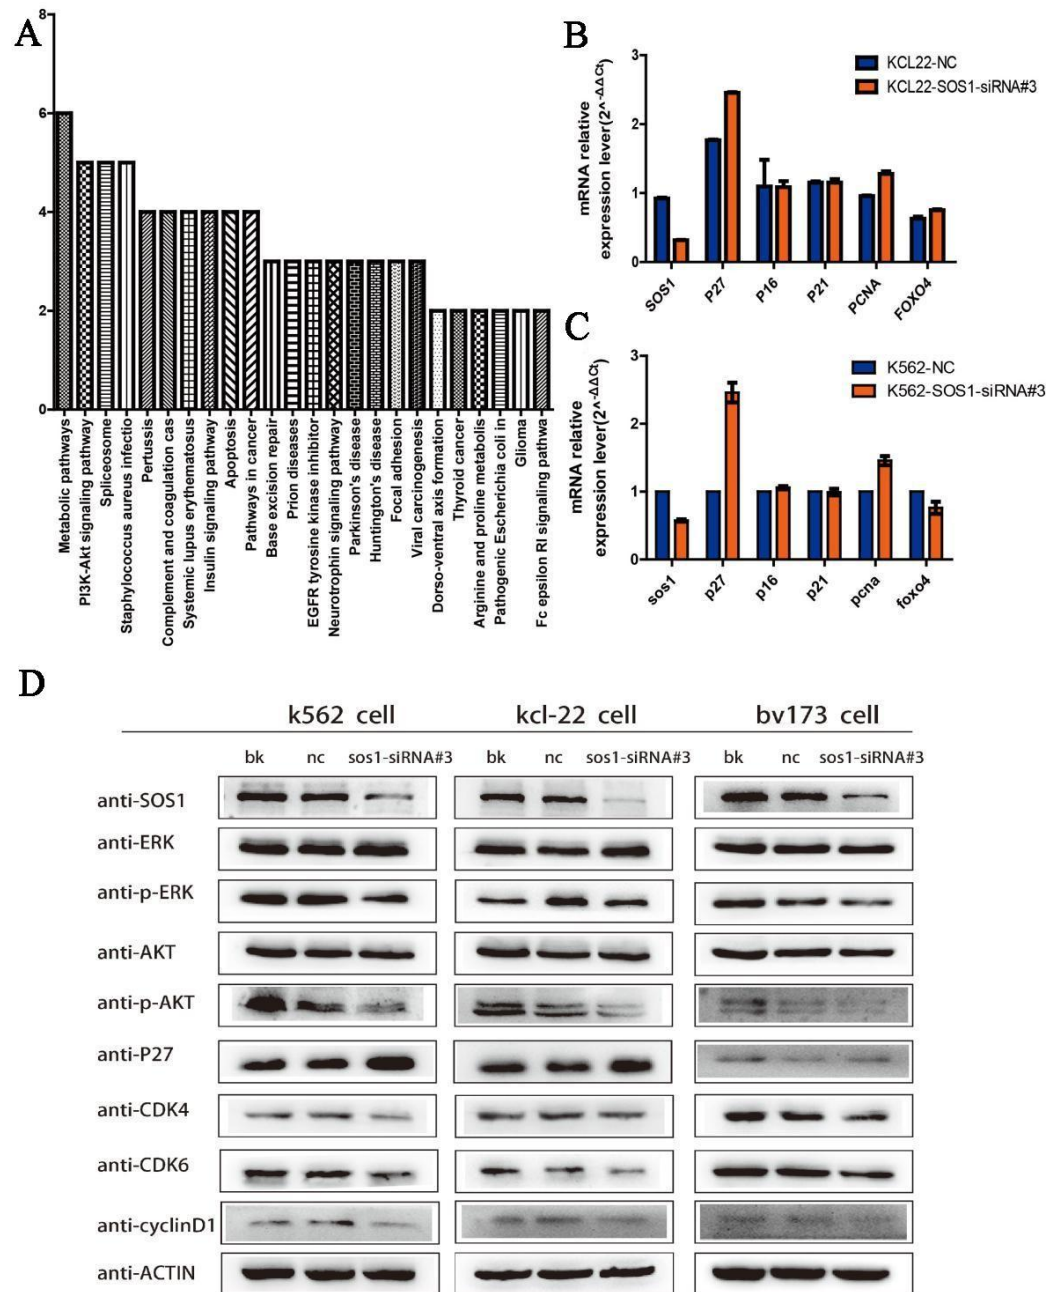

**Supplement Figure 4. Down-regulation SOS1 depressed the PI3K-AKT pathway in CML cells.** (A) KEGG pathway integration shown that SOS1 related to PI3K-AKT pathway which activates the cell cycle pathway, and we found that the down-regulation of SOS1 depressed the PI3K-AKT pathway. As we can see, the mRNA level of P21 was markedly increased both in KCL-22 and BV173 cells with the decrease of SOS1 (B and C). And we tested the change of the protein expression in the PI3K-AKT pathway, the result shown that the expression of p-ERK and p-AKT dropped but P27 increased and other cell cycle related protein were changed indicating cell cycle was arrested (D).

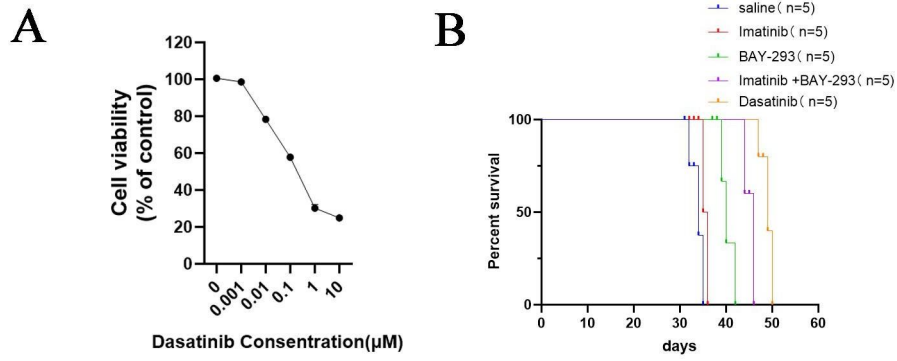

**Supplement Figure 5. Dasatinib has certain inhibitory proliferation of imatinib resistant cells.** (A) In a certain range, dasatinib inhibited KCL22-IMR cells proliferation more strongly with the increase of dasatinib concentration. (B) Survival curves were shown for mice injected with KCL22-IMR cells treated with imatinib, BAY-293, combination of imatinib and BAY-293, and dasatinib.
